# Supplementary material
Source: PubMed Central journal article supplement (PMC3024593)
Supplement: NIHMS261918-supplement-supplement_1.pdf [file NIHMS261918-supplement-supplement_1.pdf]

## SUPPLEMENTARY ONLINE DATA

# Fibulin-4 regulates expression of the tropoelastin gene and consequent elastic-fibre formation by human fibroblasts

Qiuyun CHEN<sup>\*1</sup>, Teng ZHANG<sup>\*</sup>, Joseph F. ROSHETSKY<sup>\*</sup>, Zhufeng OUYANG<sup>\*</sup>, Jeroen ESSERS<sup>†‡§</sup>, Chun FAN<sup>\*</sup>, Qing WANG<sup>\*</sup>, Aleksander HINEK<sup>¶</sup>, Edward F. PLOW<sup>\*</sup> and Paul E. DiCORLETO<sup>||</sup>\*

<sup>\*</sup>Department of Molecular Cardiology, Lerner Research Institute, Cleveland Clinic, Cleveland, OH 44195, U.S.A., <sup>†</sup>Department of Cell Biology and Genetics, Erasmus MC, Dr. Molewaterplein 50, 3015GE, Rotterdam, The Netherlands, <sup>‡</sup>Department of Radiation Oncology, Erasmus MC, Dr. Molewaterplein 50, 3015GE, Rotterdam, The Netherlands, <sup>§</sup>Department of Vascular Surgery, Erasmus MC, Dr. Molewaterplein 50, 3015GE, Rotterdam, The Netherlands, <sup>¶</sup>Cardiovascular Research, Heart Centre, Hospital for Sick Children and Department of Laboratory Medicine and Pathology, University of Toronto, Toronto, ON, Canada, M5G 1X8, and <sup>||</sup>Department of Cell Biology, Lerner Research Institute, Cleveland Clinic Cleveland, OH 44195, U.S.A.

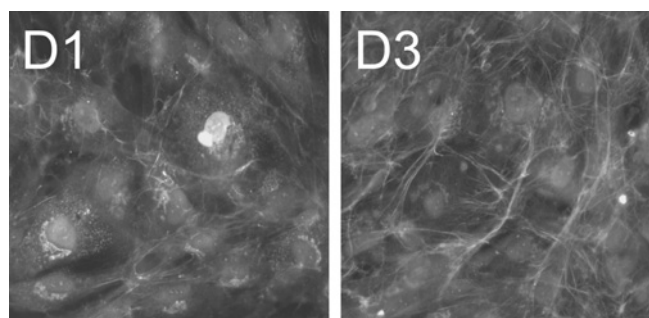

**Figure S1** Immunostaining of HFF cultures with anti-elastin antibody

HFF cultures started to produce elastic fibres as early as 1 day (D1) after subculture at cell–cell contacts. More elastic fibres were detected 3 days (D3) after subculture.

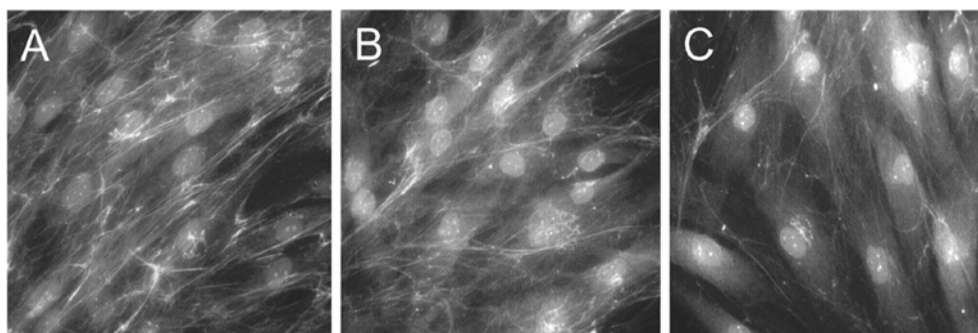

**Figure S2** Immunostaining of various fibroblast cell cultures with anti-elastin antibody

Fibroblasts derived from newborn HFFs (A), human hypertrophic scar fibroblasts (B) and adult skin fibroblasts (C) were cultured on coverslips for 7 days after the cultures reached confluency. Note that the HFF cultures (A) produced abundant and similar amounts of elastic fibres as the hypertrophic scar fibroblasts (B). The adult skin fibroblasts produced far fewer elastic fibres.

Received 30 June 2009; accepted 23 July 2009

Published as BJ Immediate Publication 23 July 2009, doi:10.1042/BJ20090993

<sup>1</sup> To whom correspondence should be addressed (email chenq3@ccf.org).
